# Supplementary material for: 17β-Estradiol counteracts pathological microtubule remodeling to enhance right ventricular function in preclinical models
Source: JCI journal article supplement (doi:10.1172/jci201385), 2026-05-07
Supplement: sd1 [file 1]

## Raw Blots Used in Supplemental Figure 2

Alpha Tubulin  
MW: 50 kDa  
1:250

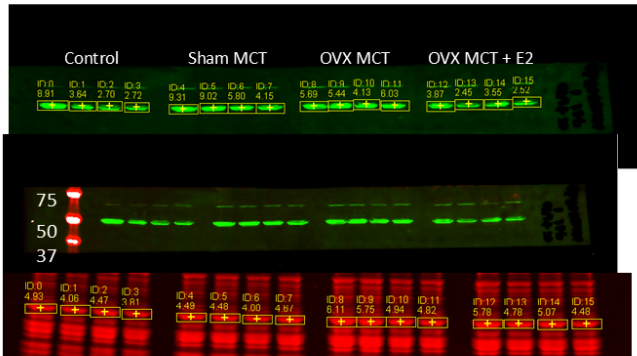

|              | Alpha tubulin | Normalizing band | Ratio | Control average | Percent control average | Percent control average (%) | Fold of control |
|--------------|---------------|------------------|-------|-----------------|-------------------------|-----------------------------|-----------------|
| Control 1    | 8.91          | 4.93             | 1.81  | 1.01            | 1.80                    | 179.75                      | 1.00            |
| Control 2    | 3.64          | 4.06             | 0.90  |                 | 0.89                    | 89.17                       |                 |
| Control 3    | 2.70          | 4.47             | 0.60  |                 | 0.60                    | 60.08                       |                 |
| Control 4    | 2.72          | 3.81             | 0.71  |                 | 0.71                    | 71.00                       |                 |
| Sham MCT     | 9.31          | 4.49             | 2.07  |                 | 2.06                    | 206.23                      | 1.60            |
| Sham MCT     | 9.02          | 4.48             | 2.01  |                 | 2.00                    | 200.25                      |                 |
| Sham MCT     | 5.80          | 4.00             | 1.45  |                 | 1.44                    | 144.21                      |                 |
| Sham MCT     | 4.15          | 4.67             | 0.89  |                 | 0.88                    | 88.38                       |                 |
| OVX MCT      | 5.69          | 6.11             | 0.93  |                 | 0.93                    | 92.62                       | 0.99            |
| OVX MCT      | 5.44          | 5.75             | 0.95  |                 | 0.94                    | 94.10                       |                 |
| OVX MCT      | 4.13          | 4.94             | 0.84  |                 | 0.83                    | 83.15                       |                 |
| OVX MCT      | 6.03          | 4.82             | 1.25  |                 | 1.24                    | 124.43                      |                 |
| OVX MCT + E2 | 3.87          | 5.78             | 0.67  |                 | 0.67                    | 66.59                       | 0.61            |
| OVX MCT + E2 | 2.45          | 4.78             | 0.51  |                 | 0.51                    | 50.98                       |                 |
| OVX MCT + E2 | 3.55          | 5.07             | 0.70  |                 | 0.70                    | 69.64                       |                 |
| OVX MCT + E2 | 2.52          | 4.48             | 0.56  |                 | 0.56                    | 55.95                       |                 |

Beta Tubulin  
MW: 50 kDa  
1:250

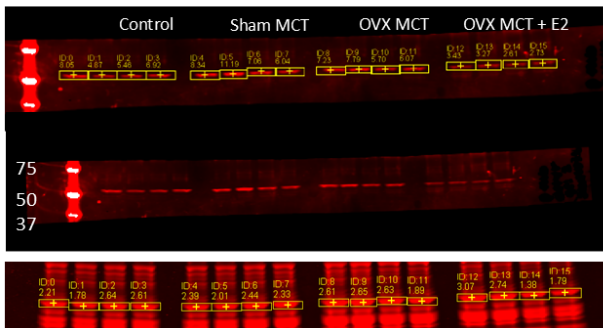

|              | Beta Tubulin | Normalizing band | Ratio | Control average | Percent control average | Percent control average (%) | Fold of control |
|--------------|--------------|------------------|-------|-----------------|-------------------------|-----------------------------|-----------------|
| Control 1    | 8.05         | 2.21             | 3.64  | 2.77            | 1.31                    | 131.29                      | 1.00            |
| Control 2    | 4.87         | 1.78             | 2.74  |                 | 0.99                    | 98.61                       |                 |
| Control 3    | 5.46         | 2.64             | 2.07  |                 | 0.75                    | 74.54                       |                 |
| Control 4    | 6.92         | 2.61             | 2.65  |                 | 0.96                    | 95.56                       |                 |
| Sham MCT     | 8.34         | 2.39             | 3.49  |                 | 1.26                    | 125.77                      | 1.31            |
| Sham MCT     | 11.19        | 2.01             | 5.57  |                 | 2.01                    | 200.65                      |                 |
| Sham MCT     | 7.06         | 2.44             | 2.89  |                 | 1.04                    | 104.29                      |                 |
| Sham MCT     | 6.04         | 2.33             | 2.59  |                 | 0.93                    | 93.43                       |                 |
| OVX MCT      | 7.23         | 2.61             | 2.77  |                 | 1.00                    | 99.84                       | 1.00            |
| OVX MCT      | 7.79         | 2.65             | 2.94  |                 | 1.06                    | 105.95                      |                 |
| OVX MCT      | 5.70         | 2.63             | 2.17  |                 | 0.78                    | 78.11                       |                 |
| OVX MCT      | 6.07         | 1.89             | 3.21  |                 | 1.16                    | 115.76                      |                 |
| OVX MCT + E2 | 3.43         | 3.07             | 1.12  |                 | 0.40                    | 40.27                       | 0.52            |
| OVX MCT + E2 | 3.27         | 2.74             | 1.19  |                 | 0.43                    | 43.01                       |                 |
| OVX MCT + E2 | 2.61         | 1.38             | 1.89  |                 | 0.68                    | 68.17                       |                 |
| OVX MCT + E2 | 2.83         | 1.79             | 1.58  |                 | 0.57                    | 56.98                       |                 |

# Detyrosinated Tubulin

MW: 50 kDa  
1:250

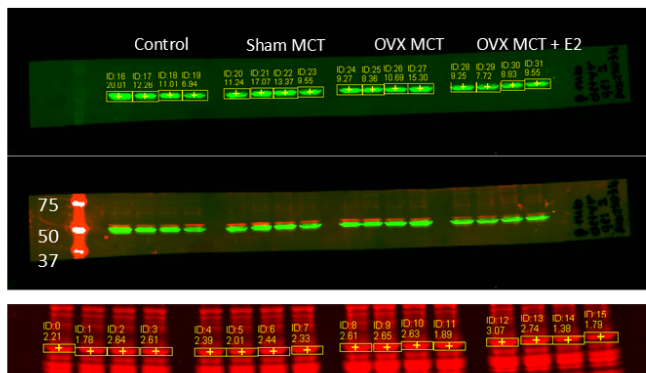

|              | Detyrosinated tubulin | Normalizing band | Ratio | Control average | Percent control average (%) | Percent control average (%) | Fold of control |
|--------------|-----------------------|------------------|-------|-----------------|-----------------------------|-----------------------------|-----------------|
| Control 1    | 20.01                 | 2.21             | 9.05  | 5.69            | 1.59                        | 159.05                      | 1.00            |
| Control 2    | 12.26                 | 1.78             | 6.89  |                 | 1.21                        | 120.99                      |                 |
| Control 3    | 11.01                 | 2.64             | 4.17  |                 | 0.73                        | 73.26                       |                 |
| Control 4    | 6.94                  | 2.61             | 2.66  |                 | 0.47                        | 46.71                       |                 |
| Sham MCT     | 11.24                 | 2.39             | 4.70  |                 | 0.83                        | 82.61                       | 1.00            |
| Sham MCT     | 17.07                 | 2.01             | 8.49  |                 | 1.49                        | 149.18                      |                 |
| Sham MCT     | 13.37                 | 2.44             | 5.48  |                 | 0.96                        | 96.25                       |                 |
| Sham MCT     | 9.55                  | 2.33             | 4.10  |                 | 0.72                        | 72.00                       |                 |
| OVX MCT      | 9.27                  | 2.61             | 3.55  |                 | 0.62                        | 62.39                       | 0.83            |
| OVX MCT      | 8.36                  | 2.65             | 3.15  |                 | 0.55                        | 55.42                       |                 |
| OVX MCT      | 10.69                 | 2.63             | 4.06  |                 | 0.71                        | 71.40                       |                 |
| OVX MCT      | 15.30                 | 1.89             | 8.10  |                 | 1.42                        | 142.20                      |                 |
| OVX MCT + E2 | 9.25                  | 3.07             | 3.01  |                 | 0.53                        | 52.93                       | 0.77            |
| OVX MCT + E2 | 7.72                  | 2.74             | 2.82  |                 | 0.49                        | 49.49                       |                 |
| OVX MCT + E2 | 8.83                  | 1.38             | 6.40  |                 | 1.12                        | 112.40                      |                 |
| OVX MCT + E2 | 9.55                  | 1.79             | 5.34  |                 | 0.94                        | 93.72                       |                 |
